# Supplementary material for: Energy-Resolved Ultrafast Spectroscopic Investigation on the Spin-Coupled Electronic States in Multiferroic Hexagonal HoMnO3
Source: MDPI journal article supplement (doi:10.3390/ma15155188), 2022-07-26
Supplement: s1 [file s1]

## Supplementary Materials:

**Table S1.** Fitting results of the  $E_{dd2}$  and  $E_{dd1}$  spectra in Figure 3 obtained by using Eq. (1).

### $E_{dd1} \ (e_{1g} \rightarrow a_{1g})$

| Temp.<br>(K) | $E_1$ (eV)            | $E_2$ (eV)            | $E_{const}$ (eV)     | $\tau_1$ (fs)        | $\tau_2$ (ps)      |
|--------------|-----------------------|-----------------------|----------------------|----------------------|--------------------|
| 35           | $-0.2547 \pm 4.1E-02$ | $-0.0819 \pm 1.4E-02$ | $2.3198 \pm 7.8E-05$ | $266.80 \pm 1.4E+01$ | $1.52 \pm 8.0E-01$ |
| 40           | $-0.2547 \pm 1.3E-05$ | $-0.0736 \pm 2.0E-05$ | $2.3139 \pm 9.5E-07$ | $283.10 \pm 4.4E-02$ | $1.98 \pm 5.2E-04$ |
| 45           | $-0.2340 \pm 5.9E-03$ | $-0.0932 \pm 2.9E-03$ | $2.3171 \pm 1.3E-03$ | $358.85 \pm 1.5E+01$ | $1.51 \pm 2.4E-01$ |
| 50           | $-0.2285 \pm 2.1E-05$ | $-0.0831 \pm 2.2E-05$ | $2.3097 \pm 5.5E-07$ | $353.18 \pm 3.9E-02$ | $1.72 \pm 3.5E-04$ |
| 55           | $-0.2719 \pm 3.9E-02$ | $-0.0802 \pm 3.9E-02$ | $2.3328 \pm 9.1E-03$ | $381.88 \pm 9.4E+01$ | $2.31 \pm 1.0E-02$ |
| 60           | $-0.2500 \pm 4.2E-02$ | $-0.0980 \pm 4.2E-02$ | $2.3219 \pm 2.0E-03$ | $263.22 \pm 4.2E+01$ | $2.40 \pm 1.1E+00$ |
| 65           | $-0.2320 \pm 6.3E-02$ | $-0.0936 \pm 6.0E-02$ | $2.3148 \pm 1.3E-03$ | $514.70 \pm 2.4E+02$ | $2.55 \pm 9.2E-01$ |
| 70           | $-0.1457 \pm 5.3E-02$ | $-0.1645 \pm 6.6E-02$ | $2.2984 \pm 1.8E-03$ | $319.07 \pm 1.8E+02$ | $1.63 \pm 4.3E-01$ |
| 75           | $-0.1415 \pm 2.9E-02$ | $-0.1703 \pm 3.3E-02$ | $2.3041 \pm 4.8E-03$ | $328.97 \pm 1.1E+01$ | $2.01 \pm 3.1E-01$ |
| 80           | -                     | $-0.3128 \pm 7.7E-03$ | $2.2980 \pm 3.9E-03$ | -                    | $1.38 \pm 1.4E-01$ |
| 100          | -                     | $-0.3116 \pm 3.2E-03$ | $2.2918 \pm 1.7E-02$ | -                    | $1.82 \pm 5.0E-01$ |
| 120          | -                     | $-0.2878 \pm 5.6E-03$ | $2.2675 \pm 3.9E-03$ | -                    | $1.26 \pm 2.5E-01$ |
| 130          | -                     | $-0.2723 \pm 6.8E-03$ | $2.2764 \pm 7.5E-03$ | -                    | $2.33 \pm 9.8E-02$ |
| 140          | -                     | $-0.2753 \pm 3.6E-03$ | $2.2365 \pm 7.7E-04$ | -                    | $2.20 \pm 1.6E-01$ |
| 150          | -                     | $-0.2468 \pm 1.4E-02$ | $2.2305 \pm 1.0E-02$ | -                    | $3.42 \pm 3.2E-01$ |

### $E_{dd2} \ (e_{2g} \rightarrow a_{1g})$

| Temp.<br>(K) | $E_1$ (eV)            | $E_2$ (eV)            | $E_{const}$ (eV)     | $\tau_1$ (fs)          | $\tau_2$ (ps)       |
|--------------|-----------------------|-----------------------|----------------------|------------------------|---------------------|
| 35           | $-0.0301 \pm 1.8E-03$ | $-0.0322 \pm 3.6E-04$ | $1.7704 \pm 3.5E-04$ | $346.520 \pm 7.0E+01$  | $2.12 \pm 3.5E-02$  |
| 40           | $-0.0248 \pm 6.4E-03$ | $-0.0363 \pm 2.5E-03$ | $1.7684 \pm 2.8E-04$ | $275.392 \pm 4.7E+01$  | $1.95 \pm 7.3E-02$  |
| 45           | $-0.0262 \pm 4.4E-03$ | $-0.0281 \pm 2.8E-03$ | $1.7642 \pm 6.4E-04$ | $485.113 \pm 1.2E+02$  | $2.32 \pm 1.4E-01$  |
| 50           | $-0.0257 \pm 5.1E-03$ | $-0.0302 \pm 3.6E-04$ | $1.7612 \pm 3.9E-04$ | $354.641 \pm 1.0E+02$  | $2.52 \pm 8.9E-02$  |
| 55           | $-0.0346 \pm 9.6E-03$ | $-0.0308 \pm 4.4E-03$ | $1.7681 \pm 2.1E-04$ | $455.891 \pm 1.6E+02$  | $2.35 \pm 1.9E-01$  |
| 60           | $-0.0383 \pm 7.2E-03$ | $-0.0364 \pm 3.3E-03$ | $1.7629 \pm 4.0E-04$ | $308.325 \pm 5.3E-01$  | $2.13 \pm 1.7E-02$  |
| 65           | $-0.0170 \pm 1.9E-03$ | $-0.0268 \pm 6.9E-04$ | $1.7515 \pm 4.1E-04$ | $342.099 \pm 4.7E+01$  | $2.98 \pm 1.6E-02$  |
| 70           | $-0.0185 \pm 1.3E-03$ | $-0.0266 \pm 2.1E-03$ | $1.7465 \pm 7.9E-05$ | $475.203 \pm 3.9E+01$  | $3.05 \pm 3.2E-01$  |
| 75           | $-0.0231 \pm 4.5E-03$ | $-0.0132 \pm 1.1E-03$ | $1.7477 \pm 4.3E-03$ | $1519.961 \pm 2.2E+02$ | $16.16 \pm 1.6E+01$ |
| 80           | $-0.0218 \pm 1.1E-02$ | $-0.0184 \pm 1.1E-02$ | $1.7441 \pm 1.8E-03$ | $1156.294 \pm 8.0E+02$ | $5.77 \pm 3.6E+00$  |
| 100          | $-0.0145 \pm 3.2E-03$ | $-0.0132 \pm 9.9E-03$ | $1.7288 \pm 1.0E-03$ | $1315.512 \pm 1.6E+03$ | $5.52 \pm 1.9E+00$  |
| 130          | $-0.0171 \pm 7.7E-03$ | $-0.0130 \pm 2.8E-03$ | $1.7166 \pm 4.5E-03$ | $576.011 \pm 7.3E+01$  | $6.82 \pm 3.5E+00$  |
| 150          | $-0.0101 \pm 2.1E-05$ | $-0.0117 \pm 4.0E-03$ | $1.7127 \pm 2.5E-03$ | $471.907 \pm 1.7E+02$  | $5.33 \pm 1.1E+00$  |
